# Supplementary material for: A multi-functional drug delivery system based on polyphenols for efficient tumor inhibition and metastasis prevention
Source: Royal Society of Chemistry journal article supplement (doi:10.1039/c9bm01646e), 2019-11-13
Supplement: c9bm01646e1.pdf [file c9bm01646e1.pdf]

**Electronic Supplementary Information**

*of*

**Multi-functional drug delivery system based on polyphenol for efficient  
tumor inhibition and metastasis prevention**

Si Chen,<sup>\*‡a</sup> Jin-Xuan Fan,<sup>‡b</sup> Di-Wei Zheng,<sup>b</sup> Fan Liu,<sup>a</sup> Xuan Zeng,<sup>\*b</sup> Guo-Ping Yan <sup>\*a</sup> and Xian-Zheng Zhang <sup>b</sup>

a. School of Material Science and Engineering, Wuhan Institute of Technology, Wuhan 430205, P.R. China. E-mail: sichen1989@163.com; guopyan2006@163.com

b. Key Laboratory of Biomedical Polymers of Ministry of Education & Department of Chemistry, Wuhan University, Wuhan 430072, P.R. China. E-mail: zeng\_xuan@163.com

† Electronic Supplementary Information (ESI) available: [details of any supplementary information available should be included here]. See DOI: 10.1039/x0xx00000x

‡ These authors contributed equally to this work

\* Corresponding Authors. sichen1989@163.com, zeng\_xuan@163.com, guopyan2006@163.com

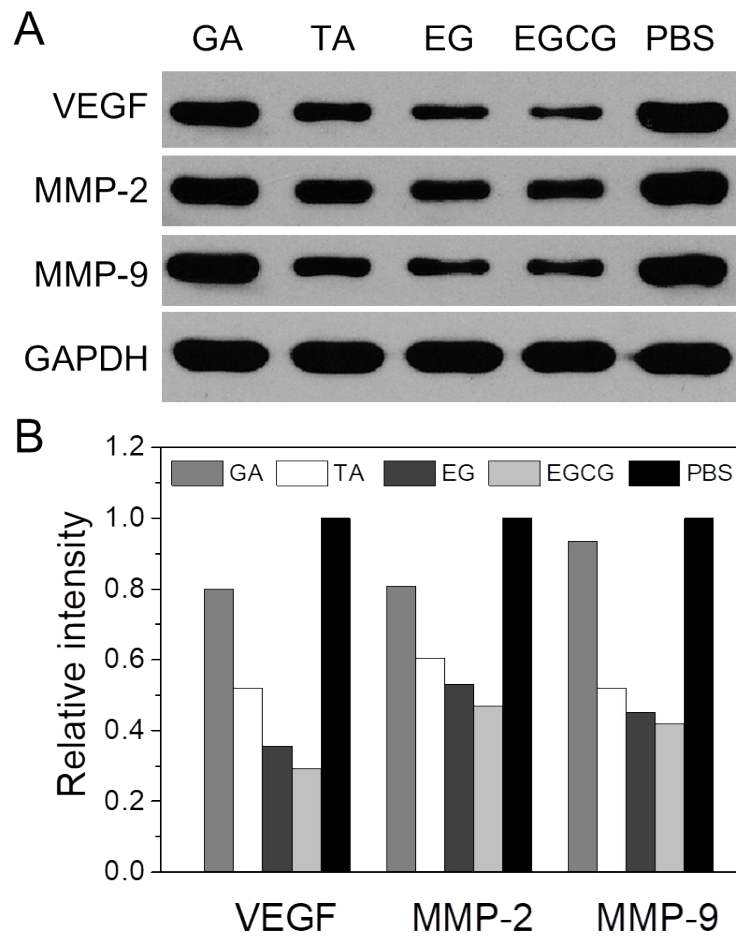

**Fig. S1.** Protein expression of MMP-2, MMP-9 and VEGF determined by Western blot.

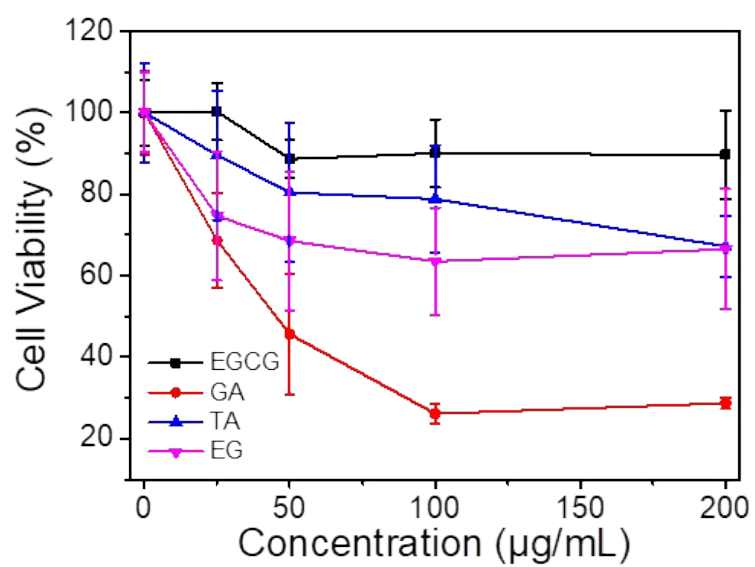

**Fig. S2.** Cell viability assay of polyphenol incubated with COS7 cells.

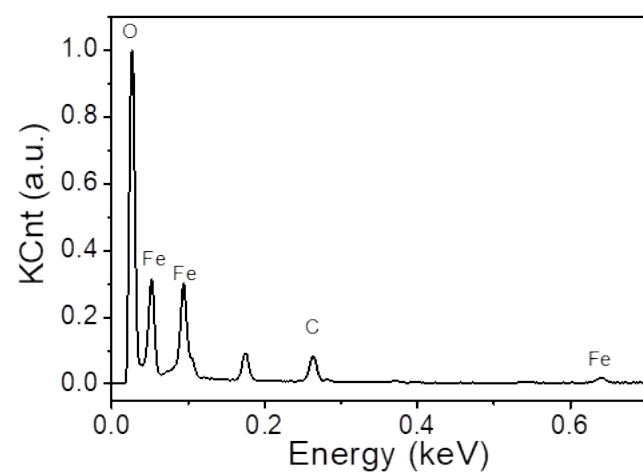

**Fig. S3.** Dispersive X-Ray photoelectron spectrum of EINP.

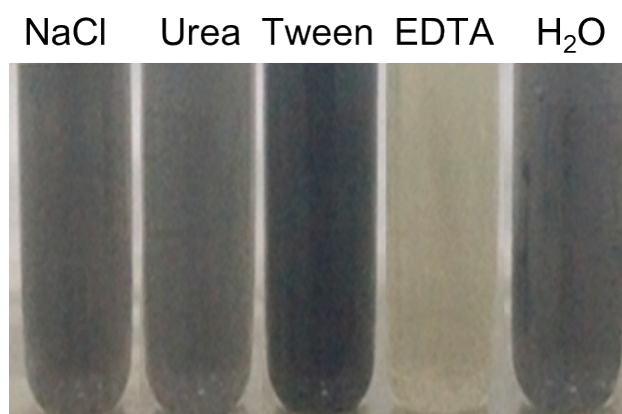

**Fig. S4.** The dissociation behaviors of EINP nano-complexes in NaCl, Urea, Tween 20, EDTA and H<sub>2</sub>O.

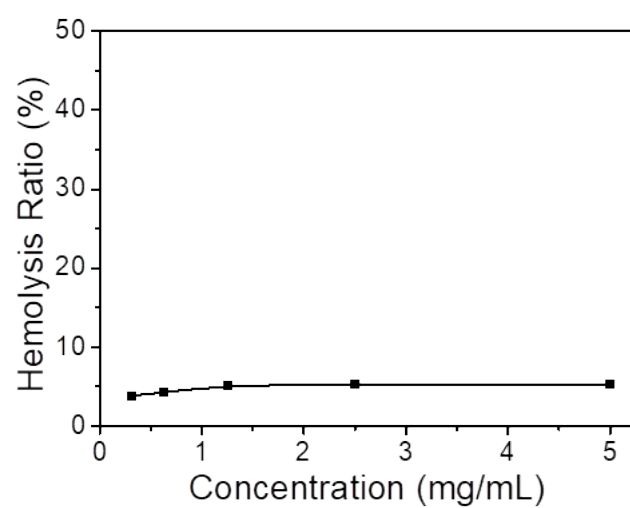

**Fig. S5.** Hemolysis ratio of EINP.

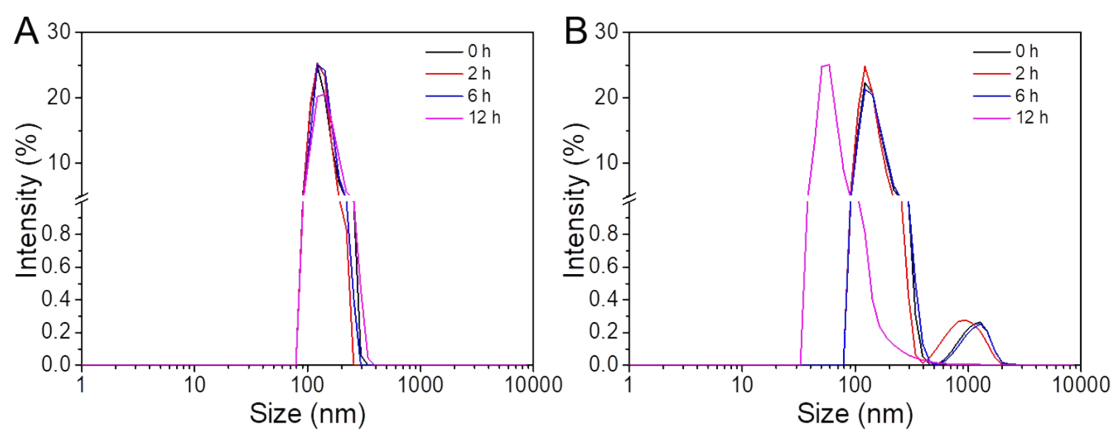

**Fig. S6.** Particle sizes of EINP@DOX at (A) pH 7.4 and (B) pH 5.6 with different incubation time.

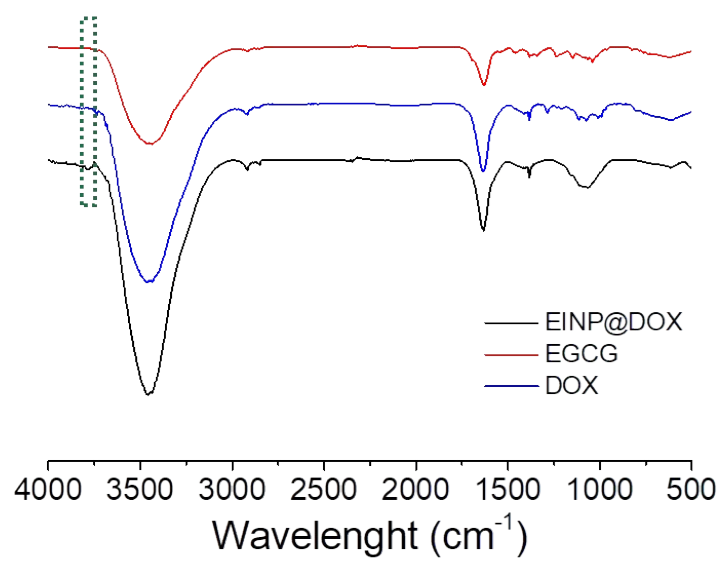

**Fig. S7.** FT-IR spectra of DOX, EGCG and EINP@DOX.



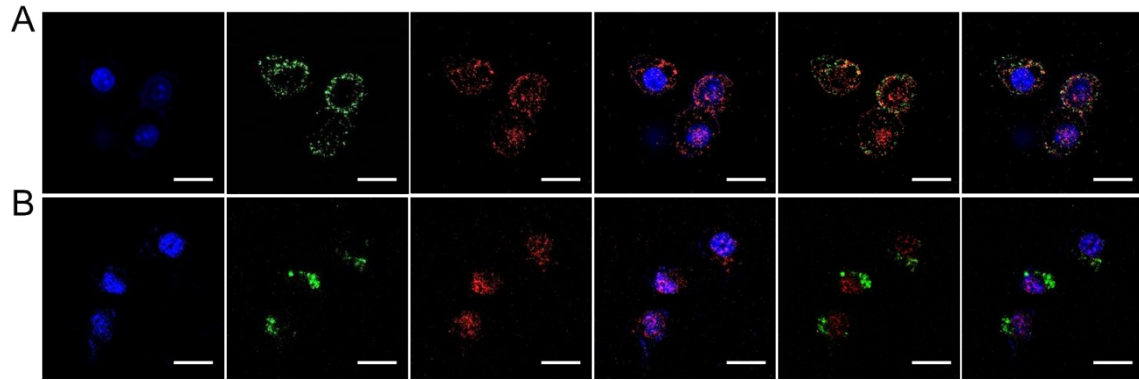

**Fig. S8.** Internalization of EINP@DOX in 4T1 cells for (A) 4 h and (B) 8 h by CLSM, nucleus was stained with Hoechst 33342 (blue signal), endosome was labeled by LysoTracker Green (green signal), DOX (red signal), the scale bar was 20  $\mu\text{m}$ .

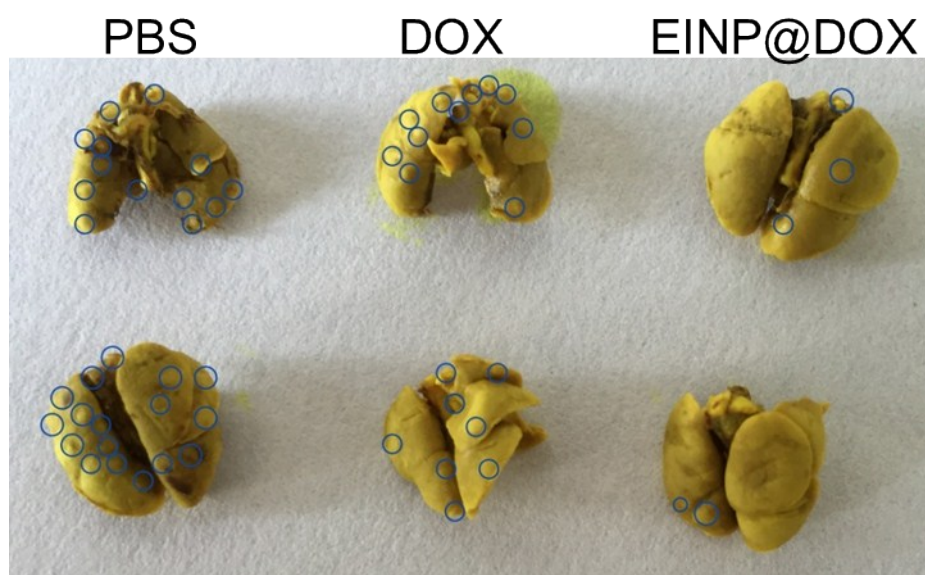

**Fig. S9.** Spontaneous lung metastases formation of 4T1 cells after 15 days of PBS, DOX or EINP@DOX treatments.

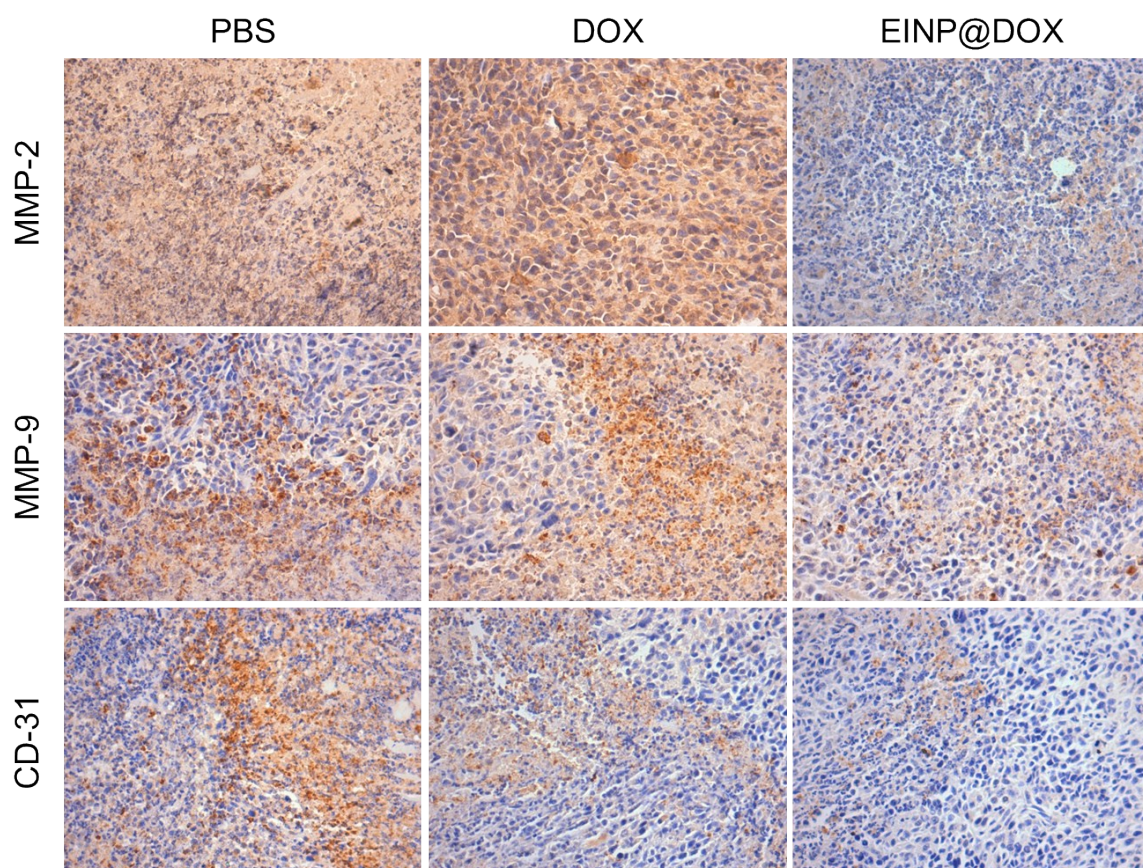

**Fig. S10.** Immunohistochemical staining of MMP-2, MMP-9 and CD-31 antibody in tumor tissues at the 25th day after treatment of samples, the magnification was  $60\times$ .
